# Supplementary material for: A Conserved Function of C. elegans CASY-1 Calsyntenin in Associative Learning
Source: PubMed Central journal article supplement (PMC2654071; doi:10.1371/journal.pone.0004880), 2009-03-16
Supplement: pone.0004880.s003.pdf [file pone.0004880.s003.pdf]

## Supplementary tables

Fig.1B

| wild-type |                           | diacetyl 10-2 |      |      | diacetyl 10-3 |      |      | diacetyl 10-4 |      |      |
|-----------|---------------------------|---------------|------|------|---------------|------|------|---------------|------|------|
|           | Plates                    | 1             | 2    | 3    | 1             | 2    | 3    | 1             | 2    | 3    |
|           | DA                        | 105           | 103  | 73   | 119           | 214  | 172  | 43            | 40   | 41   |
|           | EtOH                      | 0             | 0    | 0    | 1             | 0    | 3    | 14            | 5    | 10   |
|           | N                         | 44            | 44   | 48   | 42            | 66   | 37   | 42            | 54   | 28   |
|           | total                     | 149           | 147  | 121  | 162           | 280  | 212  | 99            | 99   | 79   |
|           | CI                        | 0.70          | 0.70 | 0.60 | 0.73          | 0.76 | 0.80 | 0.29          | 0.35 | 0.39 |
|           | <b>Average</b>            | <b>0.67</b>   |      |      | <b>0.76</b>   |      |      | <b>0.35</b>   |      |      |
|           | <b>Standard deviation</b> | <b>0.06</b>   |      |      | <b>0.03</b>   |      |      | <b>0.05</b>   |      |      |

| easy-1(tm718) |                           | diacetyl 10-2 |      |      | diacetyl 10-3 |      |   | diacetyl 10-4 |      |      |
|---------------|---------------------------|---------------|------|------|---------------|------|---|---------------|------|------|
|               | Plates                    | 1             | 2    | 3    | 1             | 2    | 3 | 1             | 2    | 3    |
|               | DA                        | 19            | 31   | 30   | 14            | 20   |   | 20            | 20   | 15   |
|               | EtOH                      | 0             | 0    | 0    | 1             | 2    |   | 7             | 10   | 3    |
|               | N                         | 5             | 5    | 10   | 4             | 9    |   | 18            | 47   | 18   |
|               | total                     | 24            | 36   | 40   | 19            | 31   |   | 45            | 77   | 36   |
|               | CI                        | 0.79          | 0.86 | 0.75 | 0.68          | 0.58 |   | 0.29          | 0.13 | 0.33 |
|               | <b>Average</b>            | <b>0.80</b>   |      |      | <b>0.63</b>   |      |   | <b>0.25</b>   |      |      |
|               | <b>Standard deviation</b> | <b>0.06</b>   |      |      | <b>0.07</b>   |      |   | <b>0.11</b>   |      |      |

Fig. 1D

|                |                |                |      |      |      |       |       |       |      |      |       |      |      |       |      |      |       |      |             |           |  |
|----------------|----------------|----------------|------|------|------|-------|-------|-------|------|------|-------|------|------|-------|------|------|-------|------|-------------|-----------|--|
| wild-type      | Conditions     | Unconditioned  |      |      |      |       |       |       |      |      |       |      |      |       |      |      |       |      |             |           |  |
|                | Trials         | day1           |      |      |      |       |       | day2  |      |      |       |      |      | day3  |      |      |       |      |             |           |  |
|                | Plates         | 1              | 2    | 3    | 4    | 5     | 6     | 1     | 2    | 3    | 4     | 5    | 6    | 1     | 2    | 3    | 4     | 5    | 6           |           |  |
|                | DA             | 88             | 72   | 82   | 61   | 100   | 65    | 107   | 72   | 114  | 71    | 37   | 59   | 76    | 78   | 83   | 64    | 66   | 80          |           |  |
|                | EtOH           | 9              | 16   | 16   | 8    | 9     | 8     | 5     | 6    | 9    | 1     | 2    | 1    | 1     | 4    | 0    | 2     | 4    | 3           |           |  |
|                | N              | 1              | 36   | 26   | 25   | 23    | 35    | 17    | 10   | 20   | 28    | 22   | 18   | 24    | 31   | 44   | 44    | 45   | 44          |           |  |
|                | total          | 98             | 124  | 124  | 94   | 132   | 108   | 129   | 88   | 143  | 100   | 61   | 78   | 101   | 113  | 127  | 110   | 115  | 127         |           |  |
|                | CI             | 0.81           | 0.45 | 0.53 | 0.56 | 0.69  | 0.53  | 0.79  | 0.75 | 0.73 | 0.70  | 0.57 | 0.74 | 0.74  | 0.65 | 0.65 | 0.56  | 0.54 | 0.61        |           |  |
|                | <b>Average</b> | <b>0.65</b>    |      |      |      |       |       |       |      |      |       |      |      |       |      |      |       |      |             |           |  |
|                | <b>SEM</b>     | <b>0.02</b>    |      |      |      |       |       |       |      |      |       |      |      |       |      |      |       |      |             |           |  |
|                | Conditions     | DA Conditioned |      |      |      |       |       |       |      |      |       |      |      |       |      |      |       |      |             |           |  |
|                | Trials         | day1           |      |      |      |       |       | day2  |      |      |       |      |      | day3  |      |      |       |      |             |           |  |
|                | Plates         | 1              | 2    | 3    | 4    | 5     | 6     | 1     | 2    | 3    | 4     | 5    | 6    | 1     | 2    | 3    | 4     | 5    | 6           |           |  |
|                | DA             | 2              | 8    | 10   | 5    | 19    | 14    | 13    | 8    | 18   | 4     | 5    | 11   | 10    | 2    | 3    | 6     | 4    | 9           |           |  |
|                | EtOH           | 2              | 7    | 7    | 4    | 19    | 16    | 18    | 12   | 13   | 4     | 7    | 10   | 4     | 3    | 2    | 6     | 7    | 3           |           |  |
| N              | 50             | 75             | 119  | 66   | 90   | 126   | 110   | 97    | 91   | 31   | 65    | 101  | 85   | 60    | 73   | 88   | 81    | 75   |             |           |  |
| total          | 54             | 90             | 136  | 75   | 128  | 156   | 141   | 117   | 122  | 39   | 77    | 122  | 99   | 65    | 78   | 100  | 92    | 87   |             |           |  |
| CI             | 0.00           | 0.01           | 0.02 | 0.01 | 0.00 | -0.01 | -0.04 | -0.03 | 0.04 | 0.00 | -0.03 | 0.01 | 0.06 | -0.02 | 0.01 | 0.00 | -0.03 | 0.07 |             |           |  |
| <b>Average</b> | <b>0.00</b>    |                |      |      |      |       |       |       |      |      |       |      |      |       |      |      |       |      | <b>% LI</b> | <b>99</b> |  |
| <b>SEM</b>     | <b>0.01</b>    |                |      |      |      |       |       |       |      |      |       |      |      |       |      |      |       |      | <b>SEM</b>  |           |  |

|                |                |                |      |      |      |      |      |      |      |      |      |      |      |      |      |   |   |   |             |           |  |
|----------------|----------------|----------------|------|------|------|------|------|------|------|------|------|------|------|------|------|---|---|---|-------------|-----------|--|
| easy-1(tm718)  | Conditions     | Unconditioned  |      |      |      |      |      |      |      |      |      |      |      |      |      |   |   |   |             |           |  |
|                | Trials         | day1           |      |      |      |      |      | day2 |      |      |      |      |      | day3 |      |   |   |   |             |           |  |
|                | Plates         | 1              | 2    | 3    | 4    | 5    | 6    | 1    | 2    | 3    | 4    | 5    | 6    | 1    | 2    | 3 | 4 | 5 | 6           |           |  |
|                | DA             | 56             | 152  | 51   | 105  | 191  | 95   | 110  | 76   | 40   | 49   | 44   | 80   | 63   | 62   |   |   |   |             |           |  |
|                | EtOH           | 49             | 45   | 23   | 52   | 62   | 35   | 28   | 20   | 35   | 2    | 2    | 5    | 3    | 0    |   |   |   |             |           |  |
|                | N              | 29             | 29   | 16   | 27   | 46   | 28   | 26   | 22   | 36   | 8    | 5    | 11   | 11   | 10   |   |   |   |             |           |  |
|                | total          | 134            | 226  | 90   | 184  | 299  | 158  | 164  | 118  | 111  | 59   | 51   | 96   | 77   | 72   |   |   |   |             |           |  |
|                | CI             | 0.05           | 0.47 | 0.31 | 0.29 | 0.43 | 0.38 | 0.50 | 0.47 | 0.05 | 0.80 | 0.82 | 0.78 | 0.78 | 0.86 |   |   |   |             |           |  |
|                | <b>Average</b> | <b>0.50</b>    |      |      |      |      |      |      |      |      |      |      |      |      |      |   |   |   |             |           |  |
|                | <b>SEM</b>     | <b>0.07</b>    |      |      |      |      |      |      |      |      |      |      |      |      |      |   |   |   |             |           |  |
|                | Conditions     | DA conditioned |      |      |      |      |      |      |      |      |      |      |      |      |      |   |   |   |             |           |  |
|                | Trials         | day1           |      |      |      |      |      | day2 |      |      |      |      |      | day3 |      |   |   |   |             |           |  |
|                | Plates         | 1              | 2    | 3    | 4    | 5    | 6    | 7    | 8    | 9    | 1    | 2    | 3    | 4    | 5    |   |   |   |             |           |  |
|                | DA             | 16             | 23   | 26   | 43   | 34   | 40   | 34   | 34   | 31   | 30   | 44   | 49   | 39   | 37   |   |   |   |             |           |  |
|                | EtOH           | 10             | 3    | 16   | 15   | 5    | 9    | 13   | 21   | 12   | 8    | 10   | 12   | 11   | 18   |   |   |   |             |           |  |
| N              | 25             | 43             | 45   | 36   | 40   | 43   | 34   | 32   | 34   | 20   | 30   | 32   | 26   | 30   |      |   |   |   |             |           |  |
| total          | 51             | 69             | 87   | 94   | 79   | 92   | 81   | 87   | 77   | 58   | 84   | 93   | 76   | 85   |      |   |   |   |             |           |  |
| CI             | 0.12           | 0.29           | 0.11 | 0.30 | 0.37 | 0.34 | 0.26 | 0.15 | 0.25 | 0.38 | 0.40 | 0.40 | 0.37 | 0.22 |      |   |   |   |             |           |  |
| <b>Average</b> | <b>0.28</b>    |                |      |      |      |      |      |      |      |      |      |      |      |      |      |   |   |   | <b>% LI</b> | <b>43</b> |  |
| <b>SEM</b>     | <b>0.03</b>    |                |      |      |      |      |      |      |      |      |      |      |      |      |      |   |   |   | <b>SEM</b>  |           |  |

Fig.1F

| wild-type     | Conditions |                         | unconditioned |      |      |      |      |      |
|---------------|------------|-------------------------|---------------|------|------|------|------|------|
|               | Trials     |                         | day1          |      |      | day2 |      |      |
|               | Plates     |                         | 1             | 2    | 3    | 1    | 2    | 3    |
|               | DA         |                         | 31            | 9    | 10   | 113  | 125  | 37   |
|               | EtOH       |                         | 0             | 0    | 0    | 7    | 7    | 1    |
|               | N          |                         | 2             | 1    | 2    | 28   | 58   | 7    |
|               | total      |                         | 34            | 12   | 15   | 149  | 192  | 48   |
|               | CI         |                         | 0.91          | 0.75 | 0.67 | 0.71 | 0.61 | 0.75 |
|               | Average    |                         | <b>0.73</b>   |      |      |      |      |      |
|               | SEM        |                         | <b>0.05</b>   |      |      |      |      |      |
| Conditions    |            | DA starving conditioned |               |      |      |      |      |      |
| Trials        |            | day2                    |               |      |      |      |      |      |
| Plates        |            | 1                       | 2             | 3    | 1    | 2    | 3    |      |
| DA            |            | 12                      | 5             | 15   | 12   | 5    | 15   |      |
| EtOH          |            | 4                       | 4             | 14   | 4    | 4    | 14   |      |
| N             |            | 69                      | 115           | 126  | 69   | 115  | 126  |      |
| total         |            | 86                      | 126           | 158  | 86   | 126  | 158  |      |
| CI            |            | 0.09                    | 0.01          | 0.01 | 0.09 | 0.01 | 0.01 |      |
| Average       |            | <b>0.04</b>             |               |      |      |      |      |      |
| SEM           |            | <b>0.04</b>             |               |      |      |      |      |      |
| Conditions    |            | DA conditioned on food  |               |      |      |      |      |      |
| Trials        |            | day1                    |               |      | day2 |      |      |      |
| Plates        |            | 1                       | 2             | 3    | 1    | 2    | 3    |      |
| DA            |            | 38                      | 92            | 62   | 101  | 67   | 79   |      |
| EtOH          |            | 14                      | 27            | 13   | 27   | 16   | 14   |      |
| N             |            | 18                      | 31            | 24   | 77   | 23   | 31   |      |
| total         |            | 71                      | 152           | 102  | 206  | 108  | 127  |      |
| CI            |            | 0.34                    | 0.43          | 0.48 | 0.36 | 0.47 | 0.51 |      |
| Average       |            | <b>0.43</b>             |               |      |      |      |      |      |
| SEM           |            | <b>0.03</b>             |               |      |      |      |      |      |
| casy-1(tm718) | Conditions |                         | unconditioned |      |      |      |      |      |
|               | Trials     |                         | day1          |      |      | day2 |      |      |
|               | Plates     |                         | 1             | 2    | 3    | 1    | 2    | 3    |
|               | DA         |                         | 43            | 57   | 35   | 46   | 101  | 141  |
|               | EtOH       |                         | 2             | 10   | 1    | 6    | 11   | 26   |
|               | N          |                         | 14            | 28   | 9    | 46   | 84   | 94   |
|               | total      |                         | 60            | 97   | 48   | 99   | 198  | 264  |
|               | CI         |                         | 0.68          | 0.48 | 0.71 | 0.40 | 0.45 | 0.44 |
|               | Average    |                         | <b>0.53</b>   |      |      |      |      |      |
|               | SEM        |                         | <b>0.06</b>   |      |      |      |      |      |
| Conditions    |            | DA starving conditioned |               |      |      |      |      |      |
| Trials        |            | day2                    |               |      |      |      |      |      |
| Plates        |            | 1                       | 2             | 3    | 1    | 2    | 3    |      |
| DA            |            | 22                      | 31            | 36   | 22   | 31   | 36   |      |
| EtOH          |            | 4                       | 11            | 18   | 4    | 11   | 18   |      |
| N             |            | 69                      | 136           | 142  | 69   | 136  | 142  |      |
| total         |            | 96                      | 180           | 199  | 96   | 180  | 199  |      |
| CI            |            | 0.19                    | 0.11          | 0.09 | 0.19 | 0.11 | 0.09 |      |
| Average       |            | <b>0.13</b>             |               |      |      |      |      |      |
| SEM           |            | <b>0.04</b>             |               |      |      |      |      |      |
| Conditions    |            | DA conditioned on food  |               |      |      |      |      |      |
| Trials        |            | day1                    |               |      | day2 |      |      |      |
| Plates        |            | 1                       | 2             | 3    | 1    | 2    | 3    |      |
| DA            |            | 105                     | 82            | 53   | 18   | 81   | 47   |      |
| EtOH          |            | 21                      | 4             | 19   | 0    | 0    | 3    |      |
| N             |            | 55                      | 26            | 54   | 71   | 109  | 138  |      |
| total         |            | 182                     | 114           | 129  | 90   | 192  | 191  |      |
| CI            |            | 0.46                    | 0.68          | 0.26 | 0.20 | 0.42 | 0.23 |      |
| Average       |            | <b>0.38</b>             |               |      |      |      |      |      |
| SEM           |            | <b>0.08</b>             |               |      |      |      |      |      |

Fig. 3A

|                |                |               |       |       |       |       |       |       |       |      |
|----------------|----------------|---------------|-------|-------|-------|-------|-------|-------|-------|------|
| wild-type      | Conditions     | Unconditioned |       |       |       |       |       |       |       |      |
|                | Trials         | day1          |       |       | day2  |       |       | day3  |       |      |
|                | Plates         | 1             | 2     | 3     | 1     | 2     | 3     | 1     | 2     | 3    |
|                | NaCl           | 161           | 130   | 29    | 138   | 280   | 186   | 303   | 316   | 263  |
|                | control        | 7             | 1     | 0     | 7     | 5     | 0     | 6     | 16    | 5    |
|                | total          | 168           | 131   | 29    | 145   | 285   | 186   | 309   | 332   | 268  |
|                | CI             | 0.92          | 0.98  | 1.00  | 0.90  | 0.96  | 1.00  | 0.96  | 0.90  | 0.96 |
|                | <b>Average</b> | <b>0.96</b>   |       |       |       |       |       |       |       |      |
|                | <b>SEM</b>     | <b>0.02</b>   |       |       |       |       |       |       |       |      |
|                | Conditions     | Conditioned   |       |       |       |       |       |       |       |      |
|                | Trials         | day1          |       |       | day2  |       |       | day3  |       |      |
|                | Plates         | 1             | 2     | 3     | 1     | 2     | 3     | 1     | 2     | 3    |
|                | NaCl           | 108           | 182   | 62    | 98    | 118   | 146   | 117   | 126   | 71   |
|                | control        | 126           | 309   | 195   | 229   | 271   | 206   | 159   | 189   | 153  |
| total          | 234            | 491           | 257   | 327   | 389   | 352   | 276   | 315   | 224   |      |
| CI             | -0.08          | -0.26         | -0.52 | -0.40 | -0.39 | -0.17 | -0.15 | -0.20 | -0.37 |      |
| <b>Average</b> | <b>-0.28</b>   |               |       |       |       |       |       |       |       |      |
| <b>SEM</b>     | <b>0.08</b>    |               |       |       |       |       |       |       |       |      |
| casy-1(tm748)  | Conditions     | Unconditioned |       |       |       |       |       |       |       |      |
|                | Trials         | day1          |       |       | day2  |       |       | day3  |       |      |
|                | Plates         | 1             | 2     | 3     | 1     | 2     | 3     | 1     | 2     | 3    |
|                | NaCl           | 49            | 47    | 33    | 169   | 101   | 106   | 170   | 178   | 139  |
|                | control        | 11            | 5     | 2     | 6     | 5     | 9     | 2     | 9     | 6    |
|                | total          | 60            | 52    | 35    | 175   | 106   | 115   | 172   | 187   | 145  |
|                | CI             | 0.63          | 0.81  | 0.89  | 0.93  | 0.91  | 0.84  | 0.98  | 0.90  | 0.92 |
|                | <b>Average</b> | <b>0.87</b>   |       |       |       |       |       |       |       |      |
|                | <b>SEM</b>     | <b>0.06</b>   |       |       |       |       |       |       |       |      |
|                | Conditions     | Conditioned   |       |       |       |       |       |       |       |      |
|                | Trials         | day1          |       |       | day2  |       |       | day3  |       |      |
|                | Plates         | 1             | 2     | 3     | 1     | 2     | 3     | 1     | 2     | 3    |
|                | NaCl           | 193           | 83    | 245   | 372   | 71    | 55    | 89    | 96    | 90   |
|                | control        | 71            | 26    | 139   | 148   | 14    | 28    | 36    | 77    | 53   |
| total          | 264            | 109           | 384   | 520   | 85    | 83    | 125   | 173   | 143   |      |
| CI             | 0.46           | 0.52          | 0.28  | 0.43  | 0.67  | 0.33  | 0.42  | 0.11  | 0.26  |      |
| <b>Average</b> | <b>0.39</b>    |               |       |       |       |       |       |       |       |      |
| <b>SEM</b>     | <b>0.10</b>    |               |       |       |       |       |       |       |       |      |

Fig. 3 B

| wild-type | Conditions     | Unconditioned |      |      | Conditioned |      |      |
|-----------|----------------|---------------|------|------|-------------|------|------|
|           |                | day1          | day2 | day3 | day1        | day2 | day3 |
|           | Cold           | 66            | 170  | 182  | 68          | n.d. | 135  |
|           | Warm           | 3             | 12   | 65   | 82          |      | 92   |
|           | total          | 69            | 182  | 247  | 150         |      | 227  |
|           | TTXi           | 0.91          | 0.87 | 0.47 | -0.09       |      | 0.19 |
|           | <b>Average</b> | <b>0.75</b>   |      |      | <b>0.05</b> |      |      |
|           | <b>SEM</b>     | <b>0.14</b>   |      |      | <b>0.14</b> |      |      |

| easy-1(tm718) | Conditions     | Unconditioned |      |      |      | Conditioned |      |      |      |
|---------------|----------------|---------------|------|------|------|-------------|------|------|------|
|               |                | day1          | day2 | day3 | day4 | day1        | day2 | day3 | day4 |
|               | Cold           | 169           | 52   | 89   | 81   | 40          | 33   | 21   | 114  |
|               | Warm           | 50            | 0    | 13   | 0    | 24          | 20   | 12   | 11   |
|               | total          | 219           | 52   | 102  | 81   | 64          | 53   | 33   | 125  |
|               | TTXi           | 0.54          | 1.00 | 0.75 | 1.00 | 0.25        | 0.25 | 0.27 | 0.82 |
|               | <b>Average</b> | <b>0.82</b>   |      |      |      | <b>0.40</b> |      |      |      |
|               | <b>SEM</b>     | <b>0.11</b>   |      |      |      | <b>0.14</b> |      |      |      |

**Fig. 4A**

wild-type % LI= 99± (from Fig. 3B)  
*easy-1(tm718)* % LI= 43± (from Fig. 3B)

|                                                         |                |               |      |      |       |      |             |           |      |      |
|---------------------------------------------------------|----------------|---------------|------|------|-------|------|-------------|-----------|------|------|
| <i>easy-1(tm718); zhlEx242.1[<i>easy-1minigene</i>]</i> | Conditions     | Unconditioned |      |      |       |      |             |           |      |      |
|                                                         | Trials         | day 1         |      |      | day 2 |      |             | day 3     |      |      |
|                                                         | Plates         | 1             | 2    | 3    | 1     | 2    |             | 1         | 2    | 3    |
|                                                         | DA             | 10            | 6    | 4    | 10    | 25   | 5           | 19        | 35   | 35   |
|                                                         | EtOH           | 1             | 1    | 0    | 1     | 0    | 0           | 0         | 1    | 5    |
|                                                         | N              | 0             | 3    | 1    | 0     | 7    | 3           | 4         | 7    | 14   |
|                                                         | total          | 11            | 10   | 5    | 11    | 32   |             | 23        | 43   | 54   |
|                                                         | CI             | 0.82          | 0.50 | 0.80 | 0.82  | 0.78 |             | 0.83      | 0.79 | 0.56 |
|                                                         | <b>Average</b> | <b>0.74</b>   |      |      |       |      |             |           |      |      |
|                                                         | <b>SEM</b>     | <b>0.05</b>   |      |      |       |      |             |           |      |      |
|                                                         | Conditions     | Conditioned   |      |      |       |      |             |           |      |      |
|                                                         | Trials         | day 1         |      |      | day 2 |      |             | day 3     |      |      |
|                                                         | Plates         | 1             | 2    | 3    | 1     | 2    |             | 1         | 2    | 3    |
|                                                         | DA             | 21            | 43   | 9    | 3     | 9    | 43          | 5         | 15   | 15   |
|                                                         | EtOH           | 14            | 26   | 7    | 3     | 6    | 26          | 2         | 9    | 2    |
|                                                         | N              | 52            | 81   | 19   | 11    | 33   | 81          | 19        | 78   | 22   |
|                                                         | total          | 87            | 150  | 35   | 17    | 48   | 150         | 26        | 102  | 39   |
| CI                                                      | 0.08           | 0.11          | 0.06 | 0.00 | 0.06  | 0.11 | 0.12        | 0.06      | 0.33 |      |
| <b>Average</b>                                          | <b>0.10</b>    |               |      |      |       |      |             |           |      |      |
| <b>SEM</b>                                              | <b>0.03</b>    |               |      |      |       |      |             |           |      |      |
|                                                         |                |               |      |      |       |      | <b>% LI</b> | <b>86</b> |      |      |

  

|                                         |                |               |      |      |       |      |             |           |   |   |
|-----------------------------------------|----------------|---------------|------|------|-------|------|-------------|-----------|---|---|
| <i>easy-1(tm718)</i> sibs without array | Conditions     | Unconditioned |      |      |       |      |             |           |   |   |
|                                         | Trials         | day 1         |      |      | day 2 |      |             | day 3     |   |   |
|                                         | Plates         | 1             | 2    | 3    | 1     | 2    |             | 1         | 2 | 3 |
|                                         | DA             | 20            | 20   | 33   | 8     | 2    |             |           |   |   |
|                                         | EtOH           | 1             | 1    | 4    | 0     | 0    |             |           |   |   |
|                                         | N              | 6             | 6    | 30   | 4     | 10   |             |           |   |   |
|                                         | total          | 27            | 27   | 67   | 12    | 12   |             |           |   |   |
|                                         | CI             | 0.70          | 0.70 | 0.43 | 0.67  | 0.17 |             |           |   |   |
|                                         | <b>Average</b> | <b>0.53</b>   |      |      |       |      |             |           |   |   |
|                                         | <b>SEM</b>     | <b>0.10</b>   |      |      |       |      |             |           |   |   |
|                                         | Conditions     | Conditioned   |      |      |       |      |             |           |   |   |
|                                         | Trials         | day 1         |      |      | day 2 |      |             | day 3     |   |   |
|                                         | Plates         | 1             | 2    | 3    | 1     | 2    |             | 1         | 2 | 3 |
|                                         | DA             | 19            | 19   | 16   | 18    | 5    |             |           |   |   |
|                                         | EtOH           | 1             | 1    | 2    | 11    | 2    |             |           |   |   |
|                                         | N              | 50            | 50   | 12   | 52    | 7    |             |           |   |   |
|                                         | total          | 70            | 70   | 30   | 81    | 14   |             |           |   |   |
| CI                                      | 0.26           | 0.26          | 0.47 | 0.09 | 0.21  |      |             |           |   |   |
| <b>Average</b>                          | <b>0.26</b>    |               |      |      |       |      |             |           |   |   |
| <b>SEM</b>                              | <b>0.06</b>    |               |      |      |       |      |             |           |   |   |
|                                         |                |               |      |      |       |      | <b>% LI</b> | <b>52</b> |   |   |

**Fig. 4B**

wild-type

% LI= 94 (from Fig. 3C)

*easy-1(tm718)*

% LI= 52 (from Fig. 3C)

|                                                   |                |               |      |      |             |           |
|---------------------------------------------------|----------------|---------------|------|------|-------------|-----------|
| <i>easy-1(tm718); zhEx242.1 [easy-1 minigene]</i> | Conditions     | Unconditioned |      |      |             |           |
|                                                   | Trials         | day1          | day2 | day3 |             |           |
|                                                   | Cold           | 17            | 15   | 14   |             |           |
|                                                   | Warm           | 5             | 0    | 0    |             |           |
|                                                   |                |               |      |      |             |           |
|                                                   | total          | 22            | 15   | 14   |             |           |
|                                                   | TTI            | 0.55          | 1.00 | 1.00 |             |           |
|                                                   | <b>average</b> | <b>0.85</b>   |      |      |             |           |
|                                                   | <b>SEM</b>     | <b>0.15</b>   |      |      |             |           |
|                                                   | Conditions     | conditioned   |      |      |             |           |
|                                                   | Trials         | day1          | day2 | day3 |             |           |
|                                                   | Cold           | 4             | 7    | 8    |             |           |
|                                                   | Warm           | 4             | 5    | 4    |             |           |
|                                                   |                |               |      |      |             |           |
|                                                   | total          | 8             | 12   | 12   |             |           |
|                                                   | TTI            | 0.00          | 0.17 | 0.33 |             |           |
|                                                   | <b>average</b> | <b>0.17</b>   |      |      | <b>% LI</b> | <b>80</b> |
|                                                   | <b>SEM</b>     | <b>0.10</b>   |      |      |             |           |

|                                         |                |               |      |      |             |           |
|-----------------------------------------|----------------|---------------|------|------|-------------|-----------|
| <i>easy-1(tm718) sibs without array</i> | Conditions     | Unconditioned |      |      |             |           |
|                                         | Trials         | day1          | day2 | day3 |             |           |
|                                         | Cold           | 81            | 133  | 169  |             |           |
|                                         | Warm           | 0             | 0    | 0    |             |           |
|                                         |                |               |      |      |             |           |
|                                         | total          | 81            | 133  | 169  |             |           |
|                                         | TTI            | 1.00          | 1.00 | 1.00 |             |           |
|                                         | <b>average</b> | <b>1.00</b>   |      |      |             |           |
|                                         | <b>SEM</b>     | <b>0.00</b>   |      |      |             |           |
|                                         | Conditions     | conditioned   |      |      |             |           |
|                                         | Trials         | day1          | day2 | day3 |             |           |
|                                         | Cold           | 114           | 132  | 109  |             |           |
|                                         | Warm           | 11            | 34   | 11   |             |           |
|                                         |                |               |      |      |             |           |
|                                         | total          | 125           | 166  | 120  |             |           |
|                                         | TTI            | 0.82          | 0.59 | 0.82 |             |           |
|                                         | <b>average</b> | <b>0.74</b>   |      |      | <b>% LI</b> | <b>26</b> |
|                                         | <b>SEM</b>     | <b>0.08</b>   |      |      |             |           |

Fig. 4C

|                                            |                |               |      |      |       |      |       |       |       |      |     |  |
|--------------------------------------------|----------------|---------------|------|------|-------|------|-------|-------|-------|------|-----|--|
| wild-type                                  | Conditions     | Unconditioned |      |      |       |      |       |       |       |      |     |  |
|                                            | trials         | day 1         |      |      | day 2 |      |       | day 3 |       |      |     |  |
|                                            | Plates         | 1             | 2    | 3    | 1     | 2    | 3     | 1     | 2     | 3    |     |  |
|                                            | DA             | 46            | 43   | 92   | 67    | 26   |       | 68    | 130   | 342  |     |  |
|                                            | EtOH           | 0             | 0    | 15   | 4     | 2    |       | 6     | 8     | 41   |     |  |
|                                            | N              | 5             | 5    | 32   | 55    | 29   |       | 30    | 30    | 101  |     |  |
|                                            | total          | 51            | 48   | 139  | 126   | 57   |       | 104   | 168   | 484  |     |  |
|                                            | CI             | 0.90          | 0.90 | 0.55 | 0.50  | 0.42 |       | 0.60  | 0.73  | 0.62 |     |  |
|                                            | <b>Average</b> | <b>0.65</b>   |      |      |       |      |       |       |       |      |     |  |
|                                            | <b>SEM</b>     | <b>0.06</b>   |      |      |       |      |       |       |       |      |     |  |
|                                            | Conditions     | Conditioned   |      |      |       |      |       |       |       |      |     |  |
|                                            | trials         | day 1         |      |      | day 2 |      |       | day 3 |       |      |     |  |
|                                            | Plates         | 1             | 2    | 3    | 1     | 2    | 3     | 1     | 2     | 3    |     |  |
|                                            | DA             | 16            | 21   | 23   | 47    | 9    |       | 85    | 86    | 37   |     |  |
| EtOH                                       | 9              | 18            | 11   | 31   | 6     |      | 54    | 61    | 32    |      |     |  |
| N                                          | 56             | 88            | 67   | 111  | 43    |      | 249   | 211   | 114   |      |     |  |
| total                                      | 81             | 127           | 101  | 189  | 58    |      | 388   | 358   | 183   |      |     |  |
| CI                                         | 0.09           | 0.02          | 0.12 | 0.08 | 0.05  |      | 0.08  | 0.07  | 0.03  |      |     |  |
| <b>Average</b>                             | <b>0.07</b>    |               |      |      |       |      |       |       |       | % LI | 90  |  |
| <b>SEM</b>                                 | <b>0.01</b>    |               |      |      |       |      |       |       |       |      |     |  |
| easy-1(tm718)                              | Conditions     | Unconditioned |      |      |       |      |       |       |       |      |     |  |
|                                            | trials         | day 1         |      |      | day 2 |      |       | day 3 |       |      |     |  |
|                                            | Plates         | 1             | 2    | 3    | 1     | 2    | 3     | 1     | 2     | 3    |     |  |
|                                            | DA             | 107           | 30   | 97   | 23    | 25   |       | 107   | 30    | 97   |     |  |
|                                            | EtOH           | 21            | 6    | 27   | 2     | 0    |       | 21    | 6     | 27   |     |  |
|                                            | N              | 95            | 18   | 69   | 63    | 72   |       | 95    | 18    | 69   |     |  |
|                                            | total          | 223           | 54   | 193  | 88    | 97   |       | 223   | 54    | 193  |     |  |
|                                            | CI             | 0.39          | 0.44 | 0.36 | 0.24  | 0.26 |       | 0.39  | 0.44  | 0.36 |     |  |
|                                            | <b>Average</b> | <b>0.36</b>   |      |      |       |      |       |       |       |      |     |  |
|                                            | <b>SEM</b>     | <b>0.03</b>   |      |      |       |      |       |       |       |      |     |  |
|                                            | Conditions     | Conditioned   |      |      |       |      |       |       |       |      |     |  |
|                                            | trials         | day 1         |      |      | day 2 |      |       | day 3 |       |      |     |  |
|                                            | Plates         | 1             | 2    | 3    | 1     | 2    | 3     | 1     | 2     | 3    |     |  |
|                                            | DA             | 60            | 25   | 16   | 13    | 4    |       | 60    | 25    | 16   |     |  |
| EtOH                                       | 31             | 12            | 0    | 0    | 0     |      | 31    | 12    | 0     |      |     |  |
| N                                          | 120            | 47            | 59   | 54   | 39    |      | 120   | 47    | 59    |      |     |  |
| total                                      | 211            | 84            | 75   | 67   | 43    |      | 211   | 84    | 75    |      |     |  |
| CI                                         | 0.14           | 0.15          | 0.21 | 0.19 | 0.09  |      | 0.14  | 0.15  | 0.21  |      |     |  |
| <b>Average</b>                             | <b>0.16</b>    |               |      |      |       |      |       |       |       | % LI | 55  |  |
| <b>SEM</b>                                 | <b>0.01</b>    |               |      |      |       |      |       |       |       |      |     |  |
| easy-1(tm718); ztEX282.1[unc-119p::CLSTN2] | Conditions     | Unconditioned |      |      |       |      |       |       |       |      |     |  |
|                                            | trials         | day 1         |      |      | day 2 |      |       | day 3 |       |      |     |  |
|                                            | Plates         | 1             | 2    | 3    | 1     | 2    | 3     | 1     | 2     | 3    |     |  |
|                                            | DA             | 7             | 2    | 10   | 5     | 5    | 2     | 2     | 9     | 6    |     |  |
|                                            | EtOH           | 1             | 1    | 1    | 0     | 0    | 0     | 0     | 2     | 2    |     |  |
|                                            | N              | 7             | 6    | 10   | 2     | 2    | 2     | 2     | 2     | 2    |     |  |
|                                            | total          | 15            | 9    | 21   | 7     | 7    | 4     | 4     | 13    | 10   |     |  |
|                                            | CI             | 0.40          | 0.11 | 0.43 | 0.71  | 0.71 | 0.50  | 0.50  | 0.54  | 0.40 |     |  |
|                                            | <b>Average</b> | <b>0.48</b>   |      |      |       |      |       |       |       |      |     |  |
|                                            | <b>SEM</b>     | <b>0.06</b>   |      |      |       |      |       |       |       |      |     |  |
|                                            | Conditions     | Conditioned   |      |      |       |      |       |       |       |      |     |  |
|                                            | trials         | day 1         |      |      | day 2 |      |       | day 3 |       |      |     |  |
|                                            | Plates         | 1             | 2    | 3    | 1     | 2    | 3     | 1     | 2     | 3    |     |  |
|                                            | DA             | 0             | 0    | 2    | 0     | 0    | 0     | 6     | 10    | 10   |     |  |
| EtOH                                       | 1              | 1             | 1    | 0    | 0     | 0    | 9     | 8     | 5     |      |     |  |
| N                                          | 4              | 3             | 6    | 10   | 3     | 7    | 35    | 13    | 17    |      |     |  |
| total                                      | 5              | 4             | 9    | 10   | 3     | 7    | 50    | 31    | 32    |      |     |  |
| CI                                         | -0.20          | -0.25         | 0.11 | 0.00 | 0.00  | 0.00 | -0.06 | 0.06  | 0.16  |      |     |  |
| <b>Average</b>                             | <b>-0.02</b>   |               |      |      |       |      |       |       |       | % LI | 104 |  |
| <b>SEM</b>                                 | <b>0.05</b>    |               |      |      |       |      |       |       |       |      |     |  |
| easy-1(tm718) sibs without ztEX282.1 array | Conditions     | Unconditioned |      |      |       |      |       |       |       |      |     |  |
|                                            | trials         | day 1         |      |      | day 2 |      |       | day 3 |       |      |     |  |
|                                            | Plates         | 1             | 2    | 3    | 1     | 2    | 3     | 1     | 2     | 3    |     |  |
|                                            | DA             | 18            | 34   |      |       |      |       | 8     | 16    | 21   |     |  |
|                                            | EtOH           | 4             | 9    |      |       |      |       | 3     | 5     | 6    |     |  |
|                                            | N              | 33            | 38   |      |       |      |       | 23    | 28    | 33   |     |  |
|                                            | total          | 55            | 81   |      |       |      |       | 34    | 49    | 60   |     |  |
|                                            | CI             | 0.25          | 0.31 |      |       |      |       | 0.15  | 0.22  | 0.25 |     |  |
|                                            | <b>Average</b> | <b>0.24</b>   |      |      |       |      |       |       |       |      |     |  |
|                                            | <b>SEM</b>     | <b>0.02</b>   |      |      |       |      |       |       |       |      |     |  |
|                                            | Conditions     | Conditioned   |      |      |       |      |       |       |       |      |     |  |
|                                            | trials         | day 1         |      |      | day 2 |      |       | day 3 |       |      |     |  |
|                                            | Plates         | 1             | 2    | 3    | 1     | 2    | 3     | 1     | 2     | 3    |     |  |
|                                            | DA             | 3             | 3    | 10   |       |      |       | 20    | 10    | 9    |     |  |
| EtOH                                       | 1              | 1             | 7    |      |       |      | 12    | 10    | 12    |      |     |  |
| N                                          | 6              | 7             | 7    |      |       |      | 102   | 77    | 74    |      |     |  |
| total                                      | 10             | 11            | 24   |      |       |      | 134   | 97    | 95    |      |     |  |
| CI                                         | 0.20           | 0.18          | 0.13 |      |       |      | 0.06  | 0.00  | -0.03 |      |     |  |
| <b>Average</b>                             | <b>0.09</b>    |               |      |      |       |      |       |       |       | % LI | 62  |  |
| <b>SEM</b>                                 | <b>0.03</b>    |               |      |      |       |      |       |       |       |      |     |  |
| easy-1(tm718); ztEX282.2[unc-119p::CLSTN2] | Conditions     | Unconditioned |      |      |       |      |       |       |       |      |     |  |
|                                            | trials         | day 1         |      |      | day 2 |      |       | day 3 |       |      |     |  |
|                                            | Plates         | 1             | 2    | 3    | 1     | 2    | 3     | 1     | 2     | 3    |     |  |
|                                            | DA             | 7             | 24   | 25   | 5     | 14   | 14    | 19    | 30    | 15   |     |  |
|                                            | EtOH           | 6             | 6    | 23   | 1     | 4    | 5     | 2     | 9     | 1    |     |  |
|                                            | N              | 8             | 9    | 9    | 3     | 3    | 3     | 4     | 10    | 3    |     |  |
|                                            | total          | 21            | 39   | 57   | 9     | 21   | 22    | 25    | 49    | 19   |     |  |
|                                            | CI             | 0.05          | 0.46 | 0.04 | 0.44  | 0.48 | 0.41  | 0.68  | 0.43  | 0.74 |     |  |
|                                            | <b>Average</b> | <b>0.41</b>   |      |      |       |      |       |       |       |      |     |  |
|                                            | <b>SEM</b>     | <b>0.08</b>   |      |      |       |      |       |       |       |      |     |  |
|                                            | Conditions     | Conditioned   |      |      |       |      |       |       |       |      |     |  |
|                                            | trials         | day 1         |      |      | day 2 |      |       | day 3 |       |      |     |  |
|                                            | Plates         | 1             | 2    | 3    | 1     | 2    | 3     | 1     | 2     | 3    |     |  |
|                                            | DA             | 18            | 8    | 9    | 8     | 5    |       | 3     | 3     | 3    |     |  |
| EtOH                                       | 17             | 11            | 5    | 6    | 5     |      | 3     | 1     | 10    |      |     |  |
| N                                          | 15             | 8             | 9    | 13   | 4     |      | 39    | 40    | 32    |      |     |  |
| total                                      | 50             | 27            | 23   | 27   | 14    |      | 45    | 44    | 45    |      |     |  |
| CI                                         | 0.02           | -0.11         | 0.17 | 0.07 | 0.00  |      | 0.00  | 0.05  | -0.16 |      |     |  |
| <b>Average</b>                             | <b>0.01</b>    |               |      |      |       |      |       |       |       | % LI | 99  |  |
| <b>SEM</b>                                 | <b>0.04</b>    |               |      |      |       |      |       |       |       |      |     |  |



|                                            |            |               |       |      |       |      |       |       |       |      |    |  |
|--------------------------------------------|------------|---------------|-------|------|-------|------|-------|-------|-------|------|----|--|
| casy-1(tm718) sibs without ztEx282.2 array | Conditions | Unconditioned |       |      |       |      |       |       |       |      |    |  |
|                                            | Trials     | day 1         |       |      | day 2 |      |       | day 3 |       |      |    |  |
|                                            | Plates     | 1             | 2     | 3    | 1     | 2    | 3     | 1     | 2     | 3    |    |  |
|                                            | DA         | 6             | 27    | 19   | 5     | 34   | 44    | 5     | 195   | 72   |    |  |
|                                            | EtOH       | 1             | 6     | 0    | 27    | 3    | 7     | 27    | 29    | 6    |    |  |
|                                            | N          | 48            | 44    | 68   | 17    | 39   | 37    | 73    | 185   | 34   |    |  |
|                                            | total      | 55            | 77    | 87   | 49    | 76   | 86    | 105   | 409   | 112  |    |  |
|                                            | CI         | 0.09          | 0.27  | 0.22 | -0.45 | 0.41 | 0.42  | -0.21 | 0.41  | 0.58 |    |  |
|                                            | Average    | 0.19          |       |      |       |      |       |       |       |      |    |  |
|                                            | SEM        | 0.12          |       |      |       |      |       |       |       |      |    |  |
|                                            | Conditions | Conditioned   |       |      |       |      |       |       |       |      |    |  |
|                                            | Trials     | day 1         |       |      | day 2 |      |       | day 3 |       |      |    |  |
|                                            | Plates     | 1             | 2     | 3    | 1     | 2    | 3     | 1     | 2     | 3    |    |  |
|                                            | DA         | 22            | 6     | 5    | 34    | 18   |       | 24    | 29    | 16   |    |  |
|                                            | EtOH       | 12            | 8     | 13   | 8     | 6    |       | 11    | 11    | 7    |    |  |
| N                                          | 69         | 38            | 28    | 57   | 30    |      | 141   | 143   | 186   |      |    |  |
| total                                      | 103        | 52            | 46    | 99   | 54    |      | 176   | 183   | 209   |      |    |  |
| CI                                         | 0.10       | -0.04         | -0.17 | 0.26 | 0.22  |      | 0.07  | 0.10  | 0.04  |      |    |  |
| Average                                    | 0.07       |               |       |      |       |      |       |       |       | % LI | 62 |  |
| SEM                                        | 0.05       |               |       |      |       |      |       |       |       |      |    |  |
| casy-1(tm718), ztEx282.3[unc-119p::CLST12] | Conditions | Unconditioned |       |      |       |      |       |       |       |      |    |  |
|                                            | Trials     | day 1         |       |      | day 2 |      |       | day 3 |       |      |    |  |
|                                            | Plates     | 1             | 2     | 3    | 1     | 2    | 3     | 1     | 2     | 3    |    |  |
|                                            | DA         | 53            | 16    | 8    | 10    | 9    | 27    | 4     | 4     | 5    |    |  |
|                                            | EtOH       | 4             | 7     | 4    | 1     | 5    | 3     | 3     | 5     | 1    |    |  |
|                                            | N          | 37            | 18    | 3    | 1     | 0    | 0     | 3     | 4     | 3    |    |  |
|                                            | total      | 94            | 41    | 15   | 12    | 14   | 30    | 10    | 13    | 9    |    |  |
|                                            | CI         | 0.52          | 0.22  | 0.27 | 0.75  | 0.29 | 0.80  | 0.10  | -0.08 | 0.44 |    |  |
|                                            | Average    | 0.37          |       |      |       |      |       |       |       |      |    |  |
|                                            | SEM        | 0.10          |       |      |       |      |       |       |       |      |    |  |
|                                            | Conditions | Conditioned   |       |      |       |      |       |       |       |      |    |  |
|                                            | Trials     | day 1         |       |      | day 2 |      |       | day 3 |       |      |    |  |
|                                            | Plates     | 1             | 2     | 3    | 1     | 2    | 3     | 1     | 2     | 3    |    |  |
|                                            | DA         | 13            | 12    | 3    | 13    | 6    | 13    | 3     | 3     | 1    |    |  |
|                                            | EtOH       | 15            | 7     |      | 10    | 4    | 4     | 9     | 4     | 1    |    |  |
| N                                          | 20         | 8             |       | 5    | 0     | 15   | 3     | 1     | 1     |      |    |  |
| total                                      | 48         | 27            | 0     | 28   | 10    | 32   | 15    | 8     | 3     |      |    |  |
| CI                                         | -0.04      | 0.19          |       | 0.11 | 0.20  | 0.28 | -0.40 | -0.13 | 0.00  |      |    |  |
| Average                                    | 0.03       |               |       |      |       |      |       |       |       | % LI | 93 |  |
| SEM                                        | 0.08       |               |       |      |       |      |       |       |       |      |    |  |
| casy-1(tm718) sibs without ztEx282.3 array | Conditions | Unconditioned |       |      |       |      |       |       |       |      |    |  |
|                                            | Trials     | day 1         |       |      | day 2 |      |       | day 3 |       |      |    |  |
|                                            | Plates     | 1             | 2     | 3    | 1     | 2    | 3     | 1     | 2     | 3    |    |  |
|                                            | DA         | 16            | 6     | 6    | 5     | 38   | 63    | 46    | 33    | 29   |    |  |
|                                            | EtOH       | 3             | 0     | 0    | 0     | 27   | 16    | 9     | 2     | 7    |    |  |
|                                            | N          | 40            | 15    | 8    | 24    | 10   | 13    | 48    | 9     | 15   |    |  |
|                                            | total      | 59            | 21    | 14   | 56    | 64   | 90    | 103   | 44    | 51   |    |  |
|                                            | CI         | 0.22          | 0.29  | 0.43 | -0.39 | 0.34 | 0.54  | 0.36  | 0.70  | 0.43 |    |  |
|                                            | Average    | 0.33          |       |      |       |      |       |       |       |      |    |  |
|                                            | SEM        | 0.11          |       |      |       |      |       |       |       |      |    |  |
|                                            | Conditions | Conditioned   |       |      |       |      |       |       |       |      |    |  |
|                                            | Trials     | day 1         |       |      | day 2 |      |       | day 3 |       |      |    |  |
|                                            | Plates     | 1             | 2     | 3    | 1     | 2    | 3     | 1     | 2     | 3    |    |  |
|                                            | DA         | 2             | 1     |      | 49    | 19   | 52    | 7     | 20    | 71   |    |  |
|                                            | EtOH       | 0             | 0     | 15   | 18    | 13   | 18    | 5     | 3     | 36   |    |  |
| N                                          | 29         | 7             |       | 30   | 7     | 39   | 14    | 38    | 102   |      |    |  |
| total                                      | 31         | 8             |       | 97   | 39    | 109  | 16    | 61    | 209   |      |    |  |
| CI                                         | 0.06       | 0.13          |       | 0.32 | 0.15  | 0.31 | 0.75  | 0.28  | 0.17  |      |    |  |
| Average                                    | 0.27       |               |       |      |       |      |       |       |       | % LI | 17 |  |
| SEM                                        | 0.08       |               |       |      |       |      |       |       |       |      |    |  |
| wild-type                                  | Conditions | Unconditioned |       |      |       |      |       |       |       |      |    |  |
|                                            | Trials     | day 1         |       |      | day 2 |      |       | day 3 |       |      |    |  |
|                                            | Plates     | 1             | 2     | 3    | 1     | 2    |       | 1     | 2     | 3    |    |  |
|                                            | DA         | 46            | 43    | 92   | 67    | 26   |       | 68    | 130   | 342  |    |  |
|                                            | EtOH       | 0             | 0     | 15   | 4     | 2    |       | 6     | 3     | 41   |    |  |
|                                            | N          | 5             | 5     | 32   | 55    | 29   |       | 30    | 30    | 101  |    |  |
|                                            | total      | 51            | 48    | 139  | 126   | 57   |       | 104   | 168   | 484  |    |  |
|                                            | CI         | 0.90          | 0.90  | 0.55 | 0.50  | 0.42 |       | 0.60  | 0.73  | 0.62 |    |  |
|                                            | Average    | 0.65          |       |      |       |      |       |       |       |      |    |  |
|                                            | SEM        | 0.06          |       |      |       |      |       |       |       |      |    |  |
|                                            | Conditions | Conditioned   |       |      |       |      |       |       |       |      |    |  |
|                                            | Trials     | day 1         |       |      | day 2 |      |       | day 3 |       |      |    |  |
|                                            | Plates     | 1             | 2     | 3    | 1     | 2    |       | 1     | 2     | 3    |    |  |
|                                            | DA         | 16            | 21    | 23   | 47    | 9    |       | 85    | 86    | 37   |    |  |
|                                            | EtOH       | 9             | 18    | 11   | 31    | 6    |       | 54    | 61    | 32   |    |  |
| N                                          | 56         | 88            | 67    | 111  | 43    |      | 249   | 211   | 114   |      |    |  |
| total                                      | 81         | 127           | 101   | 189  | 58    |      | 388   | 358   | 183   |      |    |  |
| CI                                         | 0.09       | 0.02          | 0.12  | 0.08 | 0.05  |      | 0.08  | 0.07  | 0.03  |      |    |  |
| Average                                    | 0.07       |               |       |      |       |      |       |       |       | % LI | 90 |  |
| SEM                                        | 0.01       |               |       |      |       |      |       |       |       |      |    |  |
| casy-1(tm718)                              | Conditions | Unconditioned |       |      |       |      |       |       |       |      |    |  |
|                                            | Trials     | day 1         |       |      | day 2 |      |       | day 3 |       |      |    |  |
|                                            | Plates     | 1             | 2     | 3    | 1     | 2    |       | 1     | 2     | 3    |    |  |
|                                            | DA         | 107           | 30    | 97   | 23    | 25   |       | 107   | 30    | 97   |    |  |
|                                            | EtOH       | 21            | 6     | 27   | 2     | 0    |       | 21    | 6     | 27   |    |  |
|                                            | N          | 95            | 18    | 69   | 63    | 72   |       | 95    | 18    | 69   |    |  |
|                                            | total      | 223           | 54    | 193  | 88    | 97   |       | 223   | 54    | 193  |    |  |
|                                            | CI         | 0.39          | 0.44  | 0.36 | 0.24  | 0.26 |       | 0.39  | 0.44  | 0.36 |    |  |
|                                            | Average    | 0.36          |       |      |       |      |       |       |       |      |    |  |
|                                            | SEM        | 0.03          |       |      |       |      |       |       |       |      |    |  |
|                                            | Conditions | Conditioned   |       |      |       |      |       |       |       |      |    |  |
|                                            | Trials     | day 1         |       |      | day 2 |      |       | day 3 |       |      |    |  |
|                                            | Plates     | 1             | 2     | 3    | 1     | 2    |       | 1     | 2     | 3    |    |  |
|                                            | DA         | 60            | 25    | 16   | 13    | 4    |       | 60    | 25    | 16   |    |  |
|                                            | EtOH       | 31            | 12    | 0    | 0     | 0    |       | 31    | 12    | 0    |    |  |
| N                                          | 120        | 47            | 59    | 54   | 39    |      | 120   | 47    | 59    |      |    |  |
| total                                      | 211        | 84            | 75    | 67   | 43    |      | 211   | 84    | 75    |      |    |  |
| CI                                         | 0.14       | 0.15          | 0.21  | 0.19 | 0.09  |      | 0.14  | 0.15  | 0.21  |      |    |  |
| Average                                    | 0.16       |               |       |      |       |      |       |       |       | % LI | 55 |  |
| SEM                                        | 0.01       |               |       |      |       |      |       |       |       |      |    |  |

Fig. 5A

wild-type % LI= 99 (from Fig. 3D)  
*casY-1(tm7)* % LI= 43 (from Fig. 3D)

|                            |                |               |      |      |       |      |             |           |      |   |
|----------------------------|----------------|---------------|------|------|-------|------|-------------|-----------|------|---|
| <b><i>glr-1(n2461)</i></b> | Conditions     | Unconditioned |      |      |       |      |             |           |      |   |
|                            | trials         | day 1         |      |      | day 2 |      |             | day 3     |      |   |
|                            | Plates         | 1             | 2    | 3    | 1     | 2    | 3           | 1         | 2    | 3 |
|                            | DA             | 113           | 85   | 114  | 128   | 103  |             | 77        | 104  |   |
|                            | EtOH           | 3             | 3    | 5    | 2     | 3    |             | 2         | 3    |   |
|                            | N              | 15            | 14   | 11   | 10    | 11   |             | 18        | 18   |   |
|                            | total          | 131           | 102  | 130  | 140   | 117  |             | 97        | 125  |   |
|                            | CI             | 0.84          | 0.80 | 0.84 | 0.90  | 0.85 |             | 0.77      | 0.81 |   |
|                            | <b>Average</b> | <b>0.83</b>   |      |      |       |      |             |           |      |   |
|                            | <b>SEM</b>     | <b>0.02</b>   |      |      |       |      |             |           |      |   |
|                            | Conditions     | Conditioned   |      |      |       |      |             |           |      |   |
|                            | trials         | day 1         |      |      | day 2 |      |             | day 3     |      |   |
|                            | Plates         | 1             | 2    | 3    | 1     | 2    | 3           | 1         | 2    | 3 |
|                            | DA             | 43            | 51   | 79   | 41    | 44   |             | 35        | 19   |   |
| EtOH                       | 11             | 2             | 7    | 5    | 16    |      | 1           | 4         |      |   |
| N                          | 34             | 37            | 48   | 44   | 42    |      | 28          | 17        |      |   |
| total                      | 88             | 90            | 134  | 90   | 102   |      | 64          | 40        |      |   |
| CI                         | 0.36           | 0.54          | 0.54 | 0.40 | 0.27  |      | 0.53        | 0.38      |      |   |
| <b>Average</b>             | <b>0.43</b>    |               |      |      |       |      |             |           |      |   |
| <b>SEM</b>                 | <b>0.04</b>    |               |      |      |       |      |             |           |      |   |
|                            |                |               |      |      |       |      | <b>% LI</b> | <b>48</b> |      |   |

|                                           |                |               |      |      |       |      |             |           |      |   |
|-------------------------------------------|----------------|---------------|------|------|-------|------|-------------|-----------|------|---|
| <b><i>casY-1(tm718); glr-1(n2461)</i></b> | Conditions     | Unconditioned |      |      |       |      |             |           |      |   |
|                                           | trials         | day 1         |      |      | day 2 |      |             | day 3     |      |   |
|                                           | Plates         | 1             | 2    | 3    | 1     | 2    | 3           | 1         | 2    | 3 |
|                                           | DA             | 131           | 64   |      | 127   | 76   |             | 80        | 68   |   |
|                                           | EtOH           | 27            | 29   |      | 40    | 4    |             | 5         | 1    |   |
|                                           | N              | 86            | 69   |      | 165   | 102  |             | 5         | 7    |   |
|                                           | total          | 244           | 162  |      | 332   | 182  |             | 90        | 76   |   |
|                                           | CI             | 0.43          | 0.22 |      | 0.26  | 0.40 |             | 0.83      | 0.88 |   |
|                                           | <b>Average</b> | <b>0.50</b>   |      |      |       |      |             |           |      |   |
|                                           | <b>SEM</b>     | <b>0.12</b>   |      |      |       |      |             |           |      |   |
|                                           | Conditions     | Conditioned   |      |      |       |      |             |           |      |   |
|                                           | trials         | day 1         |      |      | day 2 |      |             | day 3     |      |   |
|                                           | Plates         | 1             | 2    | 3    | 1     | 2    | 3           | 1         | 2    | 3 |
|                                           | DA             | 75            | 44   |      | 78    | 80   |             | 49        | 50   |   |
| EtOH                                      | 59             | 28            |      | 26   | 24    |      | 8           | 13        |      |   |
| N                                         | 166            | 80            |      | 115  | 183   |      | 26          | 34        |      |   |
| total                                     | 300            | 152           |      | 219  | 287   |      | 83          | 97        |      |   |
| CI                                        | 0.05           | 0.11          |      | 0.24 | 0.20  |      | 0.49        | 0.38      |      |   |
| <b>Average</b>                            | <b>0.24</b>    |               |      |      |       |      |             |           |      |   |
| <b>SEM</b>                                | <b>0.07</b>    |               |      |      |       |      |             |           |      |   |
|                                           |                |               |      |      |       |      | <b>% LI</b> | <b>51</b> |      |   |

|                                                 |                           |                       |      |
|-------------------------------------------------|---------------------------|-----------------------|------|
| <b><i>glr-1(n2461); zhEx243.1[glr-1(+)]</i></b> | Conditions                | day 1                 |      |
|                                                 | trials                    | day 1                 |      |
|                                                 | Plates                    | 1                     | 2    |
|                                                 | DA                        | 25                    | 16   |
|                                                 | EtOH                      | 0                     | 1    |
|                                                 | N                         | 9                     | 11   |
|                                                 | total                     | 34                    | 28   |
|                                                 | CI                        | 0.74                  | 0.54 |
|                                                 | <b>Average</b>            | <b>0.64</b>           |      |
|                                                 | <b>Standard deviation</b> | <b>0.39</b>           |      |
|                                                 | Conditions                | day 1                 |      |
|                                                 | trials                    | day 1                 |      |
|                                                 | Plates                    | 1                     | 2    |
|                                                 | DA                        | 5                     | 8    |
| EtOH                                            | 4                         | 2                     |      |
| N                                               | 12                        | 9                     |      |
| total                                           | 21                        | 19                    |      |
| CI                                              | 0.05                      | 0.32                  |      |
| <b>Average</b>                                  | <b>0.18</b>               | <b>% LI</b> <b>71</b> |      |
| <b>Standard deviation</b>                       | <b>0.39</b>               | <b>SEM</b>            |      |

|                                   |                |               |      |   |       |   |   |       |      |   |
|-----------------------------------|----------------|---------------|------|---|-------|---|---|-------|------|---|
| <b><i>zhEx243.1[glr-1(+)]</i></b> | Conditions     | Unconditioned |      |   |       |   |   |       |      |   |
|                                   | trials         | day 1         |      |   | day 2 |   |   | day 3 |      |   |
|                                   | Plates         | 1             | 2    | 3 | 1     | 2 | 3 | 1     | 2    | 3 |
|                                   | DA             | 2             | 9    |   | 30    |   |   | 41    | 60   |   |
|                                   | EtOH           | 0             | 1    |   | 0     |   |   | 6     | 11   |   |
|                                   | N              | 6             | 26   |   | 54    |   |   | 4     | 6    |   |
|                                   | total          | 8             | 36   |   | 84    |   |   | 51    | 77   |   |
|                                   | CI             | 0.25          | 0.22 |   | 0.36  |   |   | 0.69  | 0.64 |   |
|                                   | <b>Average</b> | <b>0.43</b>   |      |   |       |   |   |       |      |   |
|                                   | <b>SEM</b>     | <b>0.10</b>   |      |   |       |   |   |       |      |   |

|                         |                |             |      |   |       |      |   |       |       |   |      |           |
|-------------------------|----------------|-------------|------|---|-------|------|---|-------|-------|---|------|-----------|
| <b>casy-1(tm718); ;</b> | Conditions     | Conditioned |      |   |       |      |   |       |       |   |      |           |
|                         | Trials         | day 1       |      |   | day 2 |      |   | day 3 |       |   |      |           |
|                         | Plates         | 1           | 2    | 3 | 1     | 2    | 3 | 1     | 2     | 3 |      |           |
|                         | DA             | 0           | 4    |   | 17    | 20   |   | 23    | 16    |   |      |           |
|                         | EtOH           | 0           | 2    |   | 12    | 11   |   | 17    | 17    |   |      |           |
|                         | N              | 43          | 47   |   | 73    | 49   |   | 21    | 7     |   |      |           |
|                         | total          | 43          | 53   |   | 102   | 80   |   | 61    | 40    |   |      |           |
|                         | CI             | 0.00        | 0.04 |   | 0.05  | 0.11 |   | 0.10  | -0.03 |   |      |           |
|                         | <b>Average</b> | <b>0.05</b> |      |   |       |      |   |       |       |   | % LI | <b>89</b> |
|                         | <b>SEM</b>     | <b>0.02</b> |      |   |       |      |   |       |       |   |      |           |

|                                                   |                |               |      |      |       |   |      |       |      |      |           |  |
|---------------------------------------------------|----------------|---------------|------|------|-------|---|------|-------|------|------|-----------|--|
| <b>casy-1(tm718) sibs without zhEx243.1 array</b> | Conditions     | Unconditioned |      |      |       |   |      |       |      |      |           |  |
|                                                   | Trials         | day 1         |      |      | day 2 |   |      | day 3 |      |      |           |  |
|                                                   | Plates         | 1             | 2    | 3    | 1     | 2 | 3    | 1     | 2    | 3    |           |  |
|                                                   | DA             | 12            | 19   |      | 263   |   |      | 160   | 208  |      |           |  |
|                                                   | EtOH           | 0             | 0    |      | 23    |   |      | 32    | 31   |      |           |  |
|                                                   | N              | 24            | 51   |      | 301   |   |      | 20    | 54   |      |           |  |
|                                                   | total          | 36            | 70   |      | 587   |   |      | 212   | 293  |      |           |  |
|                                                   | CI             | 0.33          | 0.27 |      | 0.41  |   |      | 0.60  | 0.60 |      |           |  |
|                                                   | <b>Average</b> | <b>0.44</b>   |      |      |       |   |      |       |      |      |           |  |
|                                                   | <b>SEM</b>     | <b>0.07</b>   |      |      |       |   |      |       |      |      |           |  |
|                                                   | Conditions     | Conditioned   |      |      |       |   |      |       |      |      |           |  |
|                                                   | Trials         | day 1         |      |      | day 2 |   |      | day 3 |      |      |           |  |
| Plates                                            | 1              | 2             | 3    | 1    | 2     | 3 | 1    | 2     | 3    |      |           |  |
| DA                                                | 4              | 13            |      | 33   | 91    |   | 64   | 136   |      |      |           |  |
| EtOH                                              | 1              | 1             |      | 6    | 10    |   | 31   | 99    |      |      |           |  |
| N                                                 | 20             | 76            |      | 258  | 158   |   | 76   | 162   |      |      |           |  |
| total                                             | 25             | 90            |      | 297  | 259   |   | 171  | 397   |      |      |           |  |
| CI                                                | 0.12           | 0.13          |      | 0.09 | 0.31  |   | 0.19 | 0.09  |      |      |           |  |
| <b>Average</b>                                    | <b>0.16</b>    |               |      |      |       |   |      |       |      | % LI | <b>65</b> |  |
| <b>SEM</b>                                        | <b>0.03</b>    |               |      |      |       |   |      |       |      |      |           |  |



|                               |                   |                    |      |      |              |   |   |              |      |      |             |           |
|-------------------------------|-------------------|--------------------|------|------|--------------|---|---|--------------|------|------|-------------|-----------|
| <b>casy-1(tm718) Ex[glr-1</b> | <b>SEM</b>        | <b>0.05</b>        |      |      |              |   |   |              |      |      |             |           |
|                               | <b>Conditions</b> | <b>Conditioned</b> |      |      |              |   |   |              |      |      |             |           |
|                               | <b>Trials</b>     | <b>day 1</b>       |      |      | <b>day 2</b> |   |   | <b>day 3</b> |      |      |             |           |
|                               | <b>Plates</b>     | 1                  | 2    | 3    | 1            | 2 | 3 | 1            | 2    | 3    |             |           |
|                               | <b>DA</b>         | 4                  | 11   | 20   |              |   |   | 1            | 4    | 1    |             |           |
|                               | <b>EtOH</b>       | 0                  | 0    | 1    |              |   |   | 0            | 0    | 0    |             |           |
|                               | <b>N</b>          | 9                  | 14   | 23   |              |   |   | 7            | 5    | 4    |             |           |
|                               | <b>total</b>      | 13                 | 25   | 44   |              |   |   | 8            | 9    | 5    |             |           |
|                               | <b>CI</b>         | 0.31               | 0.44 | 0.43 |              |   |   | 0.13         | 0.44 | 0.20 |             |           |
|                               | <b>Average</b>    | <b>0.32</b>        |      |      |              |   |   |              |      |      | <b>% LI</b> | <b>59</b> |
|                               | <b>SEM</b>        | <b>0.06</b>        |      |      |              |   |   |              |      |      |             |           |

|                                                |                   |                      |   |   |              |   |   |              |      |             |            |  |
|------------------------------------------------|-------------------|----------------------|---|---|--------------|---|---|--------------|------|-------------|------------|--|
| <b>casy-1(tm718) Ex[glr-1p::casy-1] line-4</b> | <b>Conditions</b> | <b>Unconditioned</b> |   |   |              |   |   |              |      |             |            |  |
|                                                | <b>Trials</b>     | <b>day 1</b>         |   |   | <b>day 2</b> |   |   | <b>day 3</b> |      |             |            |  |
|                                                | <b>Plates</b>     | 1                    | 2 | 3 | 1            | 2 | 3 | 1            | 2    | 3           |            |  |
|                                                | <b>DA</b>         |                      |   |   |              |   |   | 7            | 5    | 2           |            |  |
|                                                | <b>EtOH</b>       |                      |   |   |              |   |   | 0            | 1    | 0           |            |  |
|                                                | <b>N</b>          |                      |   |   |              |   |   | 5            | 2    | 0           |            |  |
|                                                | <b>total</b>      |                      |   |   |              |   |   | 12           | 8    | 2           |            |  |
|                                                | <b>CI</b>         |                      |   |   |              |   |   | 0.58         | 0.50 | 1.00        |            |  |
|                                                | <b>Average</b>    | <b>0.69</b>          |   |   |              |   |   |              |      |             |            |  |
|                                                | <b>SEM</b>        | <b>0.12</b>          |   |   |              |   |   |              |      |             |            |  |
|                                                | <b>Conditions</b> | <b>Conditioned</b>   |   |   |              |   |   |              |      |             |            |  |
|                                                | <b>Trials</b>     | <b>day 1</b>         |   |   | <b>day 2</b> |   |   | <b>day 3</b> |      |             |            |  |
|                                                | <b>Plates</b>     | 1                    | 2 | 3 | 1            | 2 | 3 | 1            | 2    | 3           |            |  |
|                                                | <b>DA</b>         |                      |   |   |              |   |   | 0            | 0    | 1           |            |  |
|                                                | <b>EtOH</b>       |                      |   |   |              |   |   | 3            | 0    | 1           |            |  |
|                                                | <b>N</b>          |                      |   |   |              |   |   | 15           | 7    | 9           |            |  |
|                                                | <b>total</b>      |                      |   |   |              |   |   | 18           | 7    | 11          |            |  |
|                                                | <b>CI</b>         |                      |   |   |              |   |   | -0.17        | 0.00 | 0.00        |            |  |
| <b>Average</b>                                 | <b>-0.06</b>      |                      |   |   |              |   |   |              |      | <b>% LI</b> | <b>108</b> |  |
| <b>SEM</b>                                     | <b>0.04</b>       |                      |   |   |              |   |   |              |      |             |            |  |

|                                |                      |        |        |        |        |             |
|--------------------------------|----------------------|--------|--------|--------|--------|-------------|
| <b>Average of rescue lines</b> | <b>Unconditioned</b> |        |        |        |        |             |
|                                | <b>Lines</b>         | line 1 | line 2 | line 3 | line 4 |             |
|                                | <b>Average CI</b>    | 0.77   | 0.66   | 0.79   | 0.69   |             |
|                                | <b>SEM</b>           | 0.06   | 0.14   | 0.05   | 0.12   |             |
|                                | <b>Conditioned</b>   |        |        |        |        |             |
|                                | <b>Lines</b>         | line 1 | line 2 | line 3 | line 4 |             |
|                                | <b>Average CI</b>    | 0.34   | -0.02  | 0.32   | -0.05  |             |
|                                | <b>SEM</b>           | 0.11   | 0.08   | 0.06   | 0.04   | <b>% LI</b> |
